# Supplementary material
Source: PubMed Central journal article supplement (PMC7611838)
Supplement: EMS136014-supplement-Supporting_information.pdf [file EMS136014-supplement-Supporting_information.pdf]

# ADVANCED FUNCTIONAL MATERIALS

## Supporting Information

for *Adv. Funct. Mater.*, DOI: 10.1002/adfm.202000893

### A Chemically Defined Hydrogel for Human Liver Organoid Culture

*Shicheng Ye, Jochem W.B. Boeter, Marko Mihajlovic, Frank G.van Steenbeek, Monique E.van Wolferen, Loes A. Oosterhoff, Ary Marsee, Massimiliano Caiazzo, Luc J.W.van der Laan, Louis C. Penning, Tina Vermonden, Bart Spee, and Kerstin Schneeberger\**

## Supporting Information

## A Chemically-Defined Hydrogel for Human Liver Organoid Culture

Shicheng Ye, Jochem Boeter, Marko Mihajlovic, Frank G. van Steenbeek, Monique E. van Wolferen, Loes A. Oosterhoff, Ary Marsee, Massimiliano Caiazzo, Luc J.W. van der Laan, Louis C. Penning, Tina Vermonden, Bart Spee, Kerstin Schneeberger\*

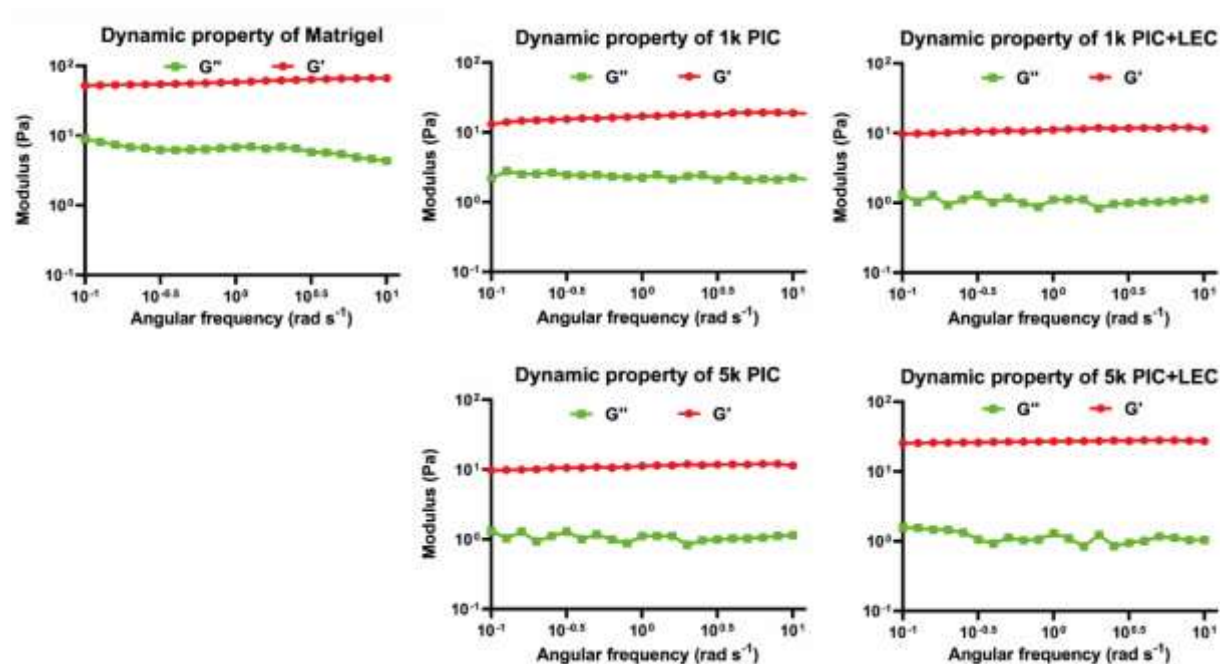

**Figure S1. Frequency dependent modulus of Matrigel and PIC hydrogels.**

A frequency sweep mode was applied to characterize the dynamic property of Matrigel, 1k PIC, 1k PIC+LEC, 5k PIC and 5k PIC+LEC with fixed strain (1%). Storage modulus  $G'$  and loss modulus  $G''$  of hydrogels were recorded in frequency sweep mode after 10 min of gelation at 37°C. For all hydrogels,  $G'$  was consistently higher than  $G''$  in all frequency ranges (10 to 0.1  $\text{rad s}^{-1}$ ), indicating that tested hydrogels were stable.

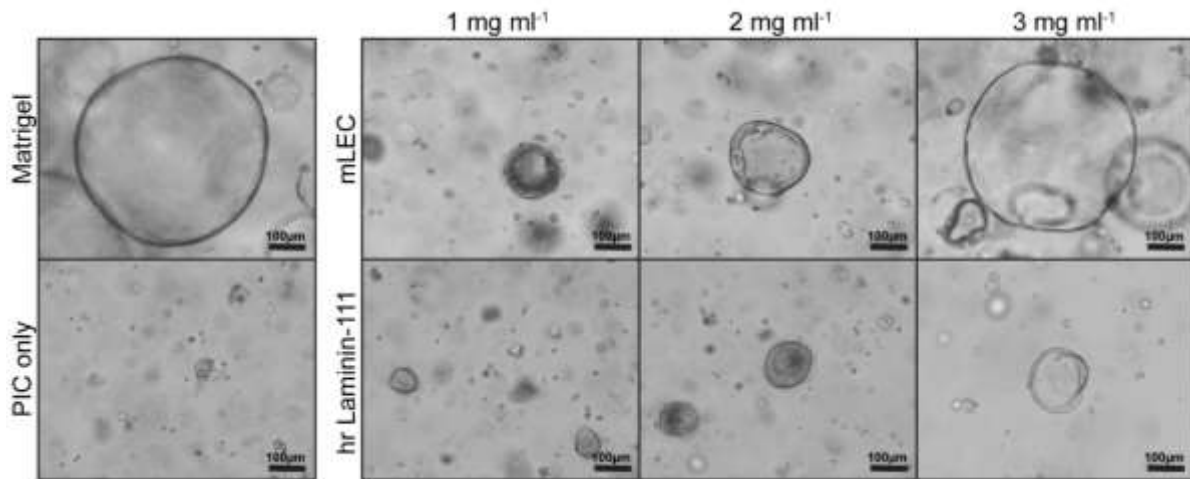

**Figure S2. Human recombinant laminin-111 can substitute LEC.**

Organoids from three different donors were cultured for 14 days in Matrigel, PIC-plain or 1k PIC supplemented with either LEC or human recombinant Laminin (hrLaminin-111). Light microscopy pictures taken at day 11 of culture are of the donor for which hrLaminin-111 had the least efficient proliferative effect compared to LEC, as a comparison to the donor shown in Figure 6a (N=2).

**Table S1. List of 100 most differentially-expressed genes in DM compared to EM.**

|                 |         |                                                                  |
|-----------------|---------|------------------------------------------------------------------|
| ENSG00000165376 | CLDN2   | claudin 2                                                        |
| ENSG00000167653 | PSCA    | prostate stem cell antigen                                       |
| ENSG00000131747 | TOP2A   | DNA topoisomerase II alpha                                       |
| ENSG00000059804 | SLC2A3  | solute carrier family 2 member 3                                 |
| ENSG00000163209 | SPRR3   | small proline rich protein 3                                     |
| ENSG00000087916 | SLC6A14 | solute carrier family 6 (amino acid transporter), member 14      |
| ENSG00000175538 | KCNE3   | potassium voltage-gated channel subfamily E regulatory subunit 3 |
| ENSG00000130600 | H19     | H19 imprinted maternally expressed transcript                    |
| ENSG00000205420 | KRT6A   | keratin 6A                                                       |
| ENSG00000114455 | HHLA2   | HERV-H LTR-associating 2                                         |
| ENSG00000148053 | NTRK2   | neurotrophic receptor tyrosine kinase 2                          |
| ENSG00000188042 | ARL4C   | ADP ribosylation factor like GTPase 4C                           |
| ENSG00000233041 | PHGR1   | proline, histidine and glycine rich 1                            |
| ENSG00000078401 | EDN1    | endothelin 1                                                     |
| ENSG00000038427 | VCAN    | versican                                                         |
| ENSG00000163817 | SLC6A20 | solute carrier family 6 member 20                                |
| ENSG00000169469 | SPRR1B  | small proline rich protein 1B                                    |

|                 |           |                                                                           |
|-----------------|-----------|---------------------------------------------------------------------------|
| ENSG00000165272 | AQP3      | aquaporin 3 (Gill blood group)                                            |
| ENSG00000188488 | SERPINA5  | serpin family A member 5                                                  |
| ENSG00000115129 | TP53I3    | tumor protein p53 inducible protein 3                                     |
| ENSG00000131746 | TNS4      | tensin 4                                                                  |
| ENSG00000152990 | ADGRA3    | adhesion G protein-coupled receptor A3                                    |
| ENSG00000197506 | SLC28A3   | solute carrier family 28 member 3                                         |
| ENSG00000167755 | KLK6      | kallikrein related peptidase 6                                            |
| ENSG00000213759 | UGT2B11   | UDP glucuronosyltransferase family 2 member B11                           |
| ENSG00000159167 | STC1      | stanniocalcin 1                                                           |
| ENSG00000120885 | CLU       | clusterin                                                                 |
| ENSG00000188549 | CCDC9B    | coiled-coil domain containing 9B                                          |
| ENSG00000007062 | PROM1     | prominin 1                                                                |
| ENSG00000170271 | FAXDC2    | fatty acid hydroxylase domain containing 2                                |
| ENSG00000198074 | AKR1B10   | aldo-keto reductase family 1 member B10                                   |
| ENSG00000131016 | AKAP12    | A-kinase anchoring protein 12                                             |
| ENSG00000156535 | CD109     | CD109 molecule                                                            |
| ENSG00000105290 | APLP1     | amyloid beta precursor like protein 1                                     |
| ENSG00000125398 | SOX9      | SRY-box transcription factor 9                                            |
| ENSG00000137857 | DUOX1     | dual oxidase 1                                                            |
| ENSG00000160181 | TFF2      | trefoil factor 2                                                          |
| ENSG00000169035 | KLK7      | kallikrein related peptidase 7                                            |
| ENSG00000019582 | CD74      | CD74 molecule                                                             |
| ENSG00000196352 | CD55      | CD55 molecule (Cromer blood group)                                        |
| ENSG00000171617 | ENC1      | ectodermal-neural cortex 1                                                |
| ENSG00000137673 | MMP7      | matrix metalloproteinase 7                                                |
| ENSG00000169876 | MUC17     | mucin 17, cell surface associated                                         |
| ENSG00000108375 | RNF43     | ring finger protein 43                                                    |
| ENSG00000167244 | IGF2      | insulin like growth factor 2                                              |
| ENSG00000104529 | EEF1D     | eukaryotic translation elongation factor 1 delta                          |
| ENSG00000074370 | ATP2A3    | ATPase sarcoplasmic/endoplasmic reticulum Ca <sup>2+</sup> transporting 3 |
| ENSG00000101842 | VSIG1     | V-set and immunoglobulin domain containing 1                              |
| ENSG00000120437 | ACAT2     | acetyl-CoA acetyltransferase 2                                            |
| ENSG00000074276 | CDHR2     | cadherin related family member 2                                          |
| ENSG00000203697 | CAPN8     | calpain 8                                                                 |
| ENSG00000196611 | MMP1      | matrix metalloproteinase 1                                                |
| ENSG00000140332 | TLE3      | TLE family member 3, transcriptional corepressor                          |
| ENSG00000088992 | TESC      | tescalcin                                                                 |
| ENSG00000180861 | LINC01559 | long intergenic non-protein coding RNA 1559                               |
| ENSG00000158201 | ABHD3     | abhydrolase domain containing 3                                           |
| ENSG00000140274 | DUOXA2    | dual oxidase maturation factor 2                                          |
| ENSG00000134419 | RPS15A    | ribosomal protein S15a                                                    |
| ENSG00000227195 | MIR663AHG | MIR663A host gene                                                         |
| ENSG00000215182 | MUC5AC    | mucin 5AC, oligomeric mucus/gel-forming                                   |
| ENSG00000101444 | AHCY      | adenosylhomocysteinase                                                    |
| ENSG00000134324 | LPIN1     | lipin 1                                                                   |
| ENSG00000109084 | TMEM97    | transmembrane protein 97                                                  |
| ENSG00000105388 | CEACAM5   | carcinoembryonic antigen related cell adhesion molecule 5                 |

|                 |         |                                                                                                   |
|-----------------|---------|---------------------------------------------------------------------------------------------------|
| ENSG00000196924 | FLNA    | filamin A                                                                                         |
| ENSG00000117707 | PROX1   | prospero homeobox 1                                                                               |
| ENSG00000140279 | DUOX2   | dual oxidase 2                                                                                    |
| ENSG00000165672 | PRDX3   | peroxiredoxin 3                                                                                   |
| ENSG00000163428 | LRRC58  | leucine rich repeat containing 58                                                                 |
| ENSG00000167508 | MVD     | mevalonate diphosphate decarboxylase                                                              |
| ENSG00000204616 | TRIM31  | tripartite motif containing 31                                                                    |
| ENSG00000080503 | SMARCA2 | SWI/SNF related, matrix associated, actin dependent regulator of chromatin, subfamily a, member 2 |
| ENSG00000100342 | APOL1   | apolipoprotein L1                                                                                 |
| ENSG00000073737 | DHRS9   | dehydrogenase/reductase 9                                                                         |
| ENSG00000205413 | SAMD9   | sterile alpha motif domain containing 9                                                           |
| ENSG00000266714 | MYO15B  | myosin XVb                                                                                        |
| ENSG00000169213 | RAB3B   | RAB3B, member RAS oncogene family                                                                 |
| ENSG00000112902 | SEMA5A  | semaphorin 5A                                                                                     |
| ENSG00000065618 | COL17A1 | collagen type XVII alpha 1 chain                                                                  |
| ENSG00000099139 | PCSK5   | proprotein convertase subtilisin/kexin type 5                                                     |
| ENSG00000147883 | CDKN2B  | cyclin dependent kinase inhibitor 2B                                                              |
| ENSG00000169174 | PCSK9   | proprotein convertase subtilisin/kexin type 9                                                     |
| ENSG00000104365 | IKBKB   | inhibitor of nuclear factor kappa B kinase subunit beta                                           |
| ENSG00000079112 | CDH17   | cadherin 17                                                                                       |
| ENSG00000015520 | NPC1L1  | NPC1 like intracellular cholesterol transporter 1                                                 |
| ENSG00000164120 | HPGD    | 15-hydroxyprostaglandin dehydrogenase                                                             |
| ENSG00000175793 | SFN     | stratifin                                                                                         |
| ENSG00000042980 | ADAM28  | ADAM metalloproteinase domain 28                                                                  |
| ENSG00000198431 | TXNRD1  | thioredoxin reductase 1                                                                           |
| ENSG00000067082 | KLF6    | Kruppel like factor 6                                                                             |
| ENSG00000131069 | ACSS2   | acyl-CoA synthetase short chain family member 2                                                   |
| ENSG00000109929 | SC5D    | sterol-C5-desaturase                                                                              |
| ENSG00000179674 | ARL14   | ADP ribosylation factor like GTPase 14                                                            |
| ENSG00000160752 | FDPS    | farnesyl diphosphate synthase                                                                     |
| ENSG00000160285 | LSS     | lanosterol synthase                                                                               |
| ENSG00000112715 | VEGFA   | vascular endothelial growth factor A                                                              |
| ENSG00000165105 | RASEF   | RAS and EF-hand domain containing                                                                 |
| ENSG00000067064 | IDI1    | isopentenyl-diphosphate delta isomerase 1                                                         |
| ENSG00000010438 | PRSS3   | serine protease 3                                                                                 |
| ENSG00000128039 | SRD5A3  | steroid 5 alpha-reductase 3                                                                       |

**Table S2. GO terms of biological processes related to liver functions.**

| ID         | Name                                                 | Genes from Input<br>(97 genes) | Genes in<br>Annotation | p-value  |
|------------|------------------------------------------------------|--------------------------------|------------------------|----------|
| GO:0008202 | steroid metabolic process                            | 15                             | 366                    | 2.34E-10 |
| GO:1901615 | organic hydroxy compound metabolic process           | 18                             | 586                    | 3.41E-10 |
| GO:0016126 | sterol biosynthetic process                          | 8                              | 83                     | 6.31E-09 |
| GO:0006694 | steroid biosynthetic process                         | 11                             | 213                    | 6.40E-09 |
| GO:0008299 | isoprenoid biosynthetic process                      | 6                              | 31                     | 7.12E-09 |
| GO:0008610 | lipid biosynthetic process                           | 18                             | 748                    | 1.57E-08 |
| GO:0016125 | sterol metabolic process                             | 10                             | 181                    | 1.71E-08 |
| GO:0006066 | alcohol metabolic process                            | 13                             | 397                    | 5.80E-08 |
| GO:0006629 | lipid metabolic process                              | 24                             | 1471                   | 8.43E-08 |
| GO:0006695 | cholesterol biosynthetic process                     | 7                              | 77                     | 8.80E-08 |
| GO:1902653 | secondary alcohol biosynthetic process               | 7                              | 78                     | 9.63E-08 |
| GO:0008203 | cholesterol metabolic process                        | 9                              | 165                    | 1.03E-07 |
| GO:1902652 | secondary alcohol metabolic process                  | 9                              | 184                    | 2.60E-07 |
| GO:0042445 | hormone metabolic process                            | 10                             | 264                    | 5.82E-07 |
| GO:0044283 | small molecule biosynthetic process                  | 16                             | 763                    | 6.93E-07 |
| GO:0042127 | regulation of cell population proliferation          | 26                             | 1921                   | 8.41E-07 |
| GO:0008284 | positive regulation of cell population proliferation | 19                             | 1096                   | 9.92E-07 |
| GO:1901617 | organic hydroxy compound biosynthetic process        | 10                             | 281                    | 1.03E-06 |
| GO:0050810 | regulation of steroid biosynthetic process           | 7                              | 111                    | 1.09E-06 |
| GO:0046165 | alcohol biosynthetic process                         | 8                              | 180                    | 2.55E-06 |
| GO:0016999 | antibiotic metabolic process                         | 7                              | 131                    | 3.31E-06 |
| GO:0017000 | antibiotic biosynthetic process                      | 4                              | 23                     | 4.17E-06 |
| GO:0030855 | epithelial cell differentiation                      | 16                             | 880                    | 4.40E-06 |
| GO:0045540 | regulation of cholesterol biosynthetic process       | 5                              | 52                     | 5.07E-06 |
| GO:0106118 | regulation of sterol biosynthetic process            | 5                              | 52                     | 5.07E-06 |
| GO:0006720 | isoprenoid metabolic process                         | 7                              | 143                    | 5.91E-06 |
| GO:0019218 | regulation of steroid metabolic process              | 7                              | 145                    | 6.47E-06 |
| GO:0017001 | antibiotic catabolic process                         | 5                              | 59                     | 9.50E-06 |
| GO:2000147 | positive regulation of cell motility                 | 13                             | 644                    | 1.28E-05 |
| GO:0042743 | hydrogen peroxide metabolic process                  | 5                              | 63                     | 1.31E-05 |
| GO:0046890 | regulation of lipid biosynthetic process             | 8                              | 225                    | 1.32E-05 |

**Table S3. List of primers used.**

| Target        | Forward primer          | Reverse primer            | Annealing Temp [°C] | Product size [bp] |
|---------------|-------------------------|---------------------------|---------------------|-------------------|
| <i>HPRT</i>   | ATAAGCCAGACTTTGTTGGA    | CTCAACTTGA ACTCTCATCTTAGG | 57                  | 192               |
| <i>RPL19</i>  | ATGAGTATGCTCAGGCTTCAG   | GATCAGCCCATCTTTGATGAG     | 60                  | 150               |
| <i>ALB</i>    | GTTCGTTACACCAAGAAAGTACC | GACCACGGATAGATAGTCTTCTG   | 64                  | 144               |
| <i>CYP3A4</i> | TTTTGTCCTACCATAAGGGCTTT | CACAGGCTGTTGACCATCAT      | 64                  | 92                |
| <i>MRP2</i>   | GGGATCTCTTCCACACTGGAT   | CATACAGGCCCTGAAGAGGA      | 64                  | 91                |
| <i>LGR5</i>   | GCAGTGTTACCTTCCC        | GGTCCACACTCCAATTCTG       | 64                  | 266               |

**Table S4. List of antibodies used.**

| Primary antibodies diluted in antibody diluent (Dako) for IF |                              |           |          |                              |            |
|--------------------------------------------------------------|------------------------------|-----------|----------|------------------------------|------------|
| Antigen                                                      | Source and cat. number       | Raised in | Dilution | Antigen retrieval            | Incubation |
| Ki67                                                         | Thermo Scientific, RM-9106-S | rabbit    | 1:75     | TE buffer for 30 min at 98°C | O/N at 4°C |
| E-cadherin                                                   | BD Bioscience, 610181        | mouse     | 1:100    |                              |            |
| PCNA                                                         | Santa Cruz, sc-56            | mouse     | 1:300    |                              |            |
| CK19                                                         | Abcam, ab76539               | rabbit    | 1:150    |                              |            |
| Secondary antibodies diluted in antibody diluent (Dako)      |                              |           |          |                              |            |
| Antigen                                                      | Source and cat. number       | Raised in | Dilution | Incubation                   |            |
| Anti-mouse Alexa 488                                         | ThermoFisher A-11029         | goat      | 1:200    | 1 h at RT                    |            |
| Anti-rabbit Alexa 488                                        | ThermoFisher A-11034         |           |          |                              |            |
| Anti-mouse Alexa 568                                         | ThermoFisher A-11004         |           |          |                              |            |
| Anti-rabbit Alexa 568                                        | ThermoFisher A-11036         |           |          |                              |            |
